# Supplementary material for: Anti‐Inflammatory Resveratrol Protects Mice From Early Mortality After Haematopoietic Stem Cell Transplantation
Source: PubMed Central journal article supplement (PMC11790355; doi:10.1111/jcmm.70395), 2025-02-03
Supplement: JCMM-29-e70395-s001.pdf [file JCMM-29-e70395-s001.pdf]

## Supplementary Materials for

# **Anti-inflammatory resveratrol protects mice from early mortality after hematopoietic stem cell transplantation**

Xiao Zhang *et al.*

\*Corresponding author. Email: [zhangjian@sustech.edu.cn](mailto:zhangjian@sustech.edu.cn)

### **This PDF file includes:**

Figures S1 to S4

Legends for figures S1 to S4

Tables S1

Captions for tables S1

Figure S1

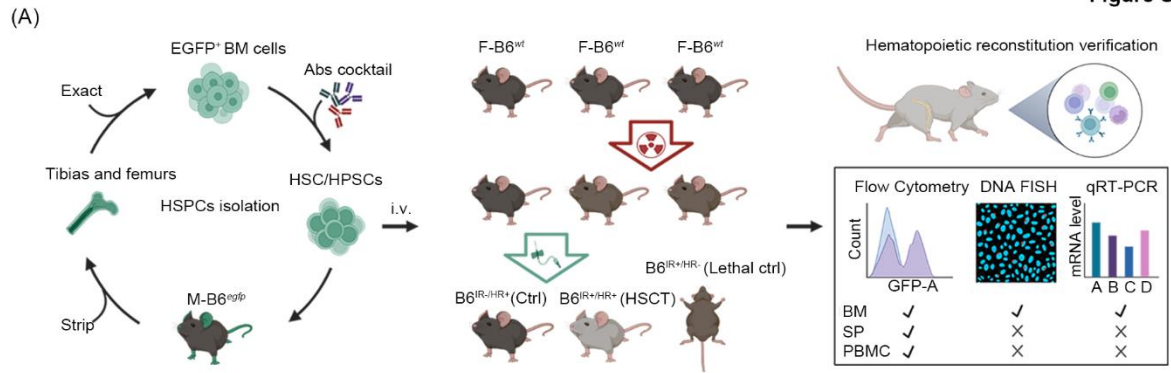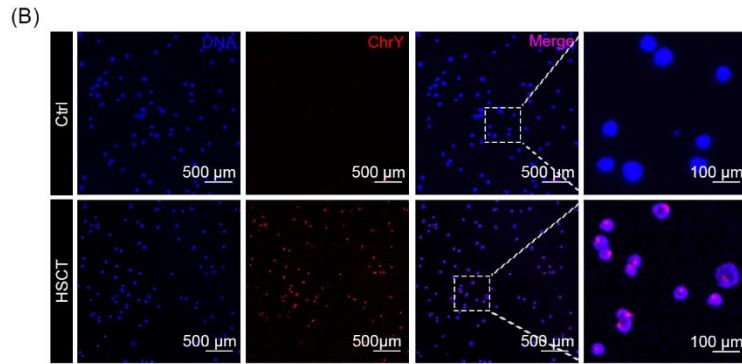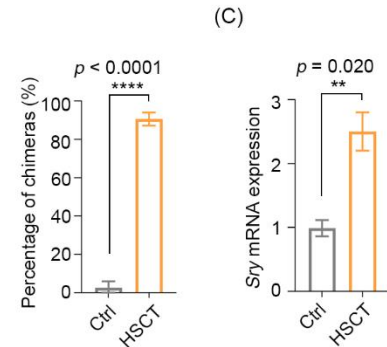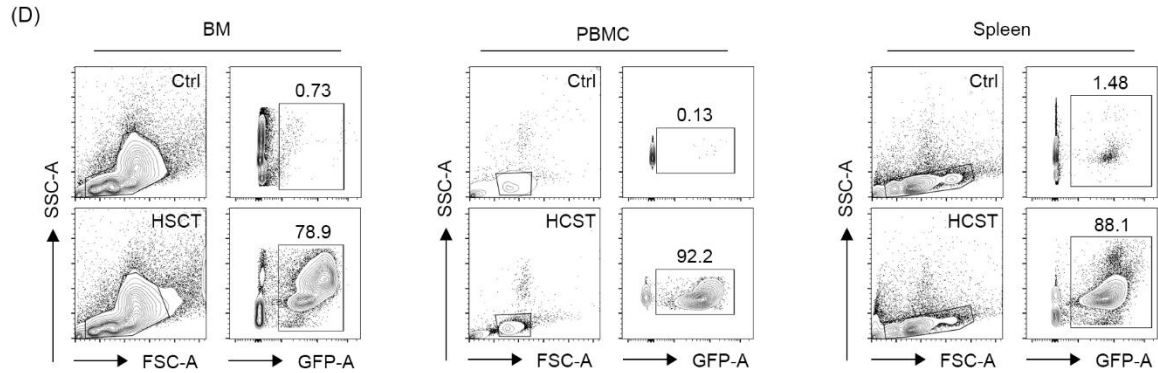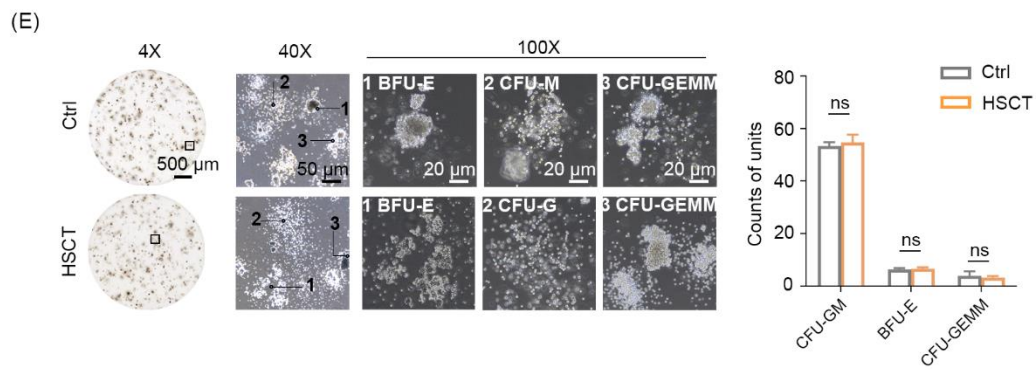

Figure S2

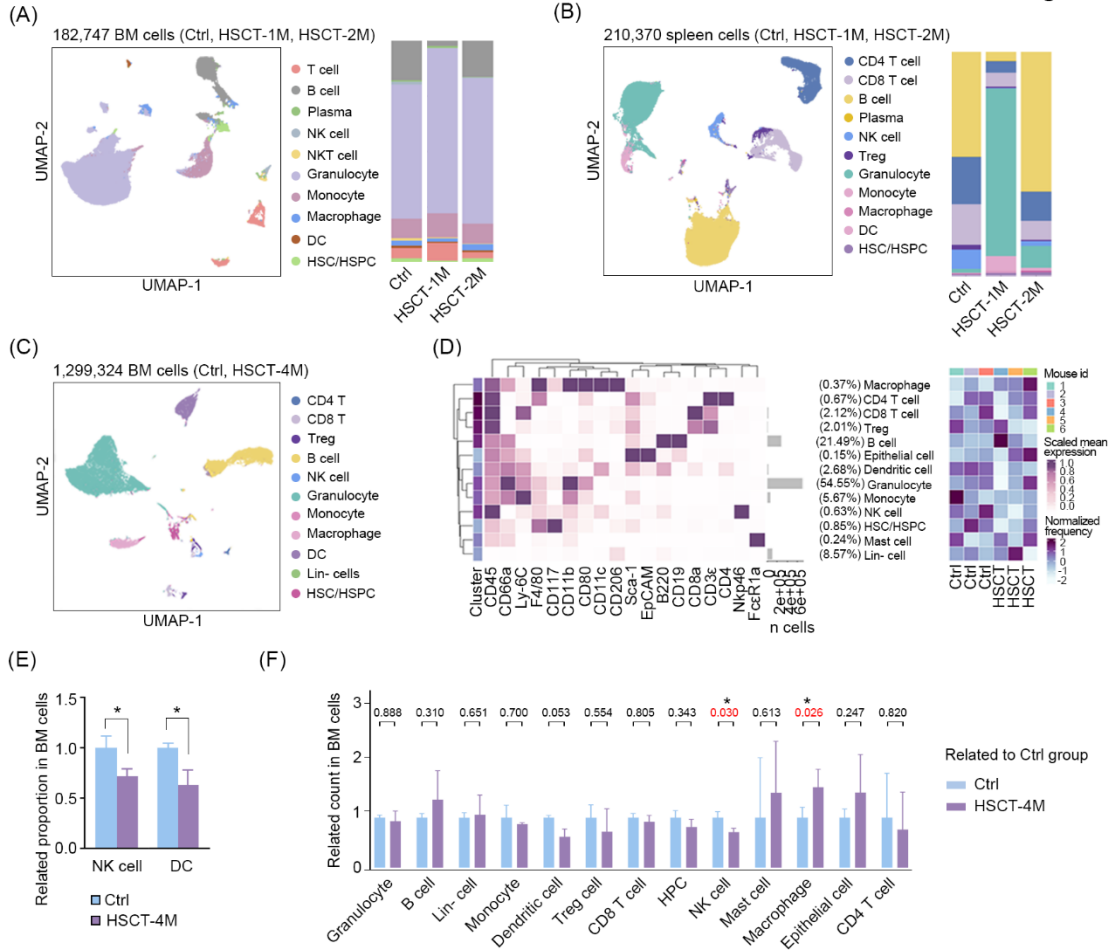

Figure S3

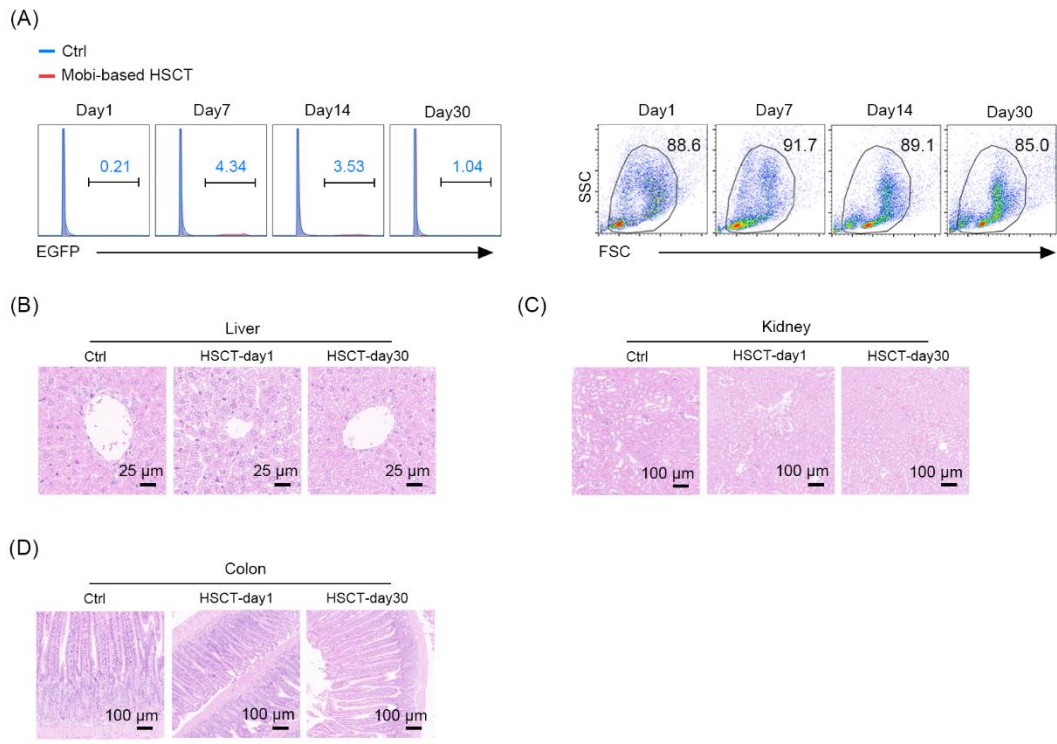

Figure S4

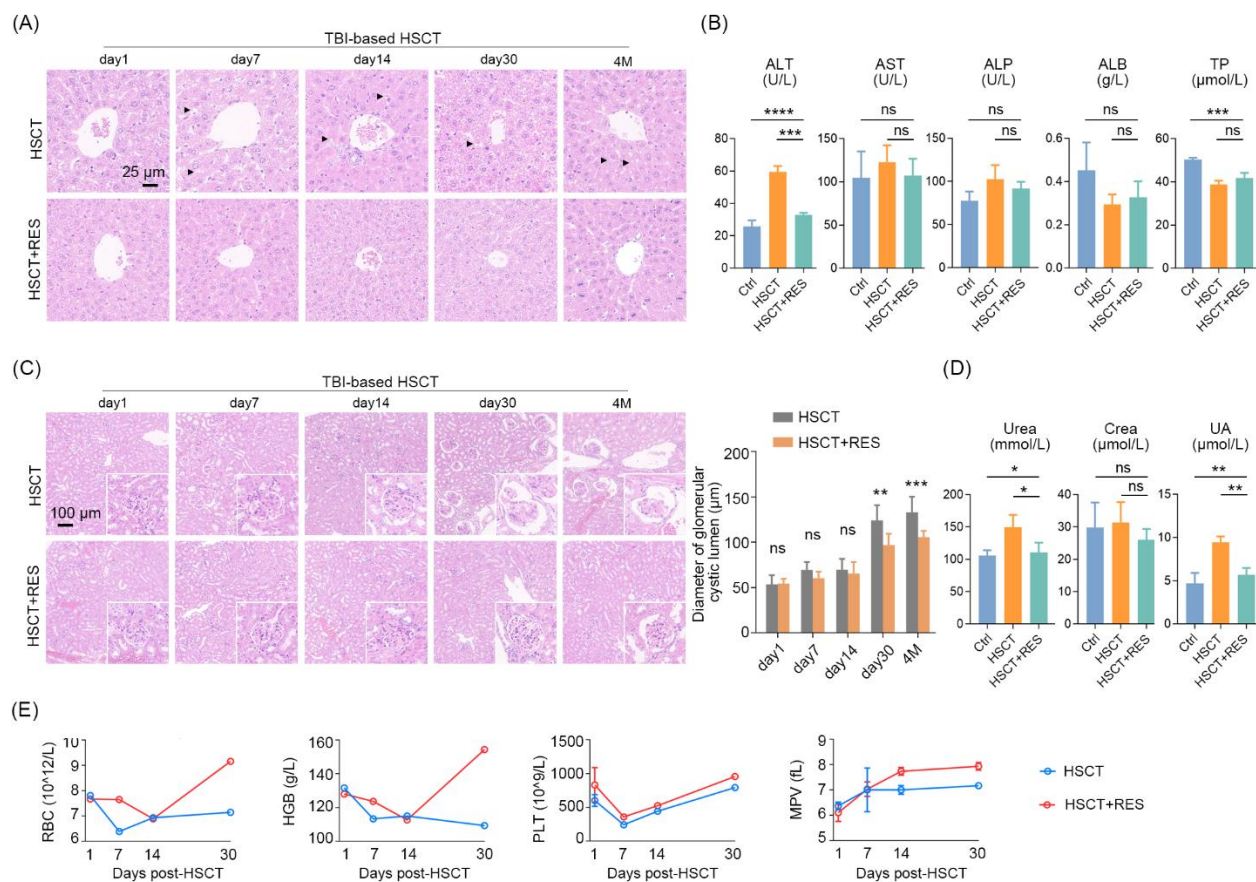

## SUPPLEMENTARY FIGURE LEGENDS

**Figure S1** Hematopoietic stem cell transplantation enables hematopoietic reconstitution in mice. **A** Schematics of operation and validation used in the study. **B** Results (left) and percentage (right) of Y-chromosome fragment probe (ChrY-Texas-red) on bone marrow smears using DNA fluorescence in situ hybridization in ctrl and HSCT mice. **C** qRT-PCR analysis illustrating the mRNA levels of *Sry* gene in bone marrow cells. **D** Flow cytometry determining the percentage of chimeras (EGFP<sup>+</sup> cells) in bone marrow (left), peripheral blood mononuclear cells (PBMC; middle), and spleen (right). **E** CFU assay of HSPCs derived from the bone marrow of ctrl and HSCT mice on the day 30 following HSCT. ns (no significance)  $p > 0.05$ ,  $*p < 0.05$ ,  $**p < 0.01$ ,  $***p < 0.001$ ,  $****p < 0.0001$

**Figure S2** CyTOF analysis of immune cells from the ctrl and HCT mice at the first, second and the fourth month post-transplantation. **A–B** UMAP plots illustrating the dimension reduction results of 182,747 bone marrow cells (A) and 210,370 spleen cells (B). The cells were grouped by cell type (left) and condition (right). **C** UMAP plot of 1,299,324 bone marrow cells from ctrl and SHCT mice at the fourth month post transplantation. **D** Feature plot illustrating the marker expression (left), cell composition (middle), and cluster density (right) of the respective mice mentioned above. **E** Quantitative differences in counts of various cell types in the ctrl and fourth-month post-transplantation mice. **F** Related bar plot showing related cell counts of the ctrl and the fourth month post-transplantation mice.

**Figure S3** Mobilization-based transplantation does not result in radiation-induced damage. **A** Flow cytometry depicting the proportion of EGFP<sup>+</sup> cells (left) and effective cells (right) within bone marrow from ctrl and mobilization-based HSCT mice on day 1, day 7, day 14 and day 30 post-transplantation. **B–D** HE staining of liver, kidney and intestine of ctrl and mobilization-based HSCT mice.

**Figure S4** Resveratrol mitigates the hepatotoxicity and nephrotoxicity induced by TBI. **A** HE staining of liver in HSCT and HSCT-RES mice on day 1, day 7, day 14, day 30, and 4-month post-transplantation. **B** Levels of liver function indices. **C** HE staining of kidney, and diameters of glomerular cystic lumen of the above-mentioned groups. **D** Levels of kidney function indices. **E** Whole blood count of HSCT and HSCT-RES mice on day 1, day 7, day 14 and day 30 post-transplantation.

**Table S1** CyTOF antibodies and reagents

| Target  | Tag   | Source            | CAS No.   |
|---------|-------|-------------------|-----------|
| CD45    | 89Y   | Standard BioTools | #3089005B |
| B220    | 106Cd | R&d               | #MAB1217  |
| BST-2   | 116Cd | Standard BioTools | #MAB8660  |
| IL-3R   | 140Ce | R&d               | #MAB983   |
| CD205   | 142Nd | Abcam             | #ab208649 |
| CD66a   | 143Nd | R&d               | #AF6480   |
| FcεRIIA | 144Nd | R&d               | #MAB6900  |
| CD4     | 145Nd | Standard BioTools | #3145002B |
| F4/80   | 146Nd | Standard BioTools | #3146008B |
| ST2     | 147Nd | R&d               | #MAB10041 |
| CD95    | 148Nd | Abcam             | #ab227907 |
| CD19    | 149Sm | Standard BioTools | #3149002B |
| CCR7    | 150Nd | R&d               | #MAB3477  |
| CD49d   | 151Eu | Standard BioTools | #3151016B |
| CD3ε    | 152Sm | Standard BioTools | #3152004B |
| Nkp46   | 153Eu | Standard BioTools | #3153006B |
| CTLA-4  | 154Sm | Standard BioTools | #3154008B |
| CD138   | 155Gd | R&d               | #MAB2966  |
| PD-1    | 159Tb | Standard BioTools | #3159006B |
| CD62L   | 160Gd | Standard BioTools | #3160008B |
| Ly-6C   | 162Dy | Standard BioTools | #3162014B |



|                                    |             |                   |           |
|------------------------------------|-------------|-------------------|-----------|
| CD38                               | 163Dy       | R&d               | #AF4947   |
| Sca-1                              | 164Dy       | Standard BioTools | #3164005B |
| CD326                              | 165Ho       | Standard BioTools | #3165014B |
| CD117                              | 166Er       | Standard BioTools | #3166004B |
| CXCR3                              | 167Er       | R&d               | #MAB1685  |
| CD8a                               | 168Er       | Standard BioTools | #3168003B |
| CD206                              | 169Tm       | Standard BioTools | #3169021B |
| IL-7RA                             | 170Er       | R&d               | #AF747    |
| CD80                               | 171Yb       | Standard BioTools | #3171008B |
| CD11b                              | 172Yb       | Standard BioTools | #3172012B |
| CD21                               | 173Yb       | Abcam             | #ab271855 |
| IL-17RE                            | 174Yb       | R&d               | #MAB7997  |
| FcεR1A                             | 176Yb       | Standard BioTools | #3176006B |
| CD11c                              | 209Bi       | Standard BioTools | #3209005B |
| CD16/CD32 Fc block                 |             | BD                | #553142   |
| Cell Staining Buffer               |             | Standard BioTools | #201068   |
| Cell Acquisition Buffer            |             | Standard BioTools | #201240   |
| Fix and Perm Buffer                |             | Standard BioTools | #201067   |
| EQ Four Elements Calibration Beads |             | Standard BioTools | #P20C3116 |
| Cell-ID Cisplatin                  | 195Pt       | Standard BioTools | #201064   |
| Cell-ID Intercalator-Ir            | 191Ir/193Ir | Standard BioTools | #201192B  |
